# Supplementary material for: Evaluating Diversity and Stereotypes Amongst Healthcare Providers Using Generative AI
Source: Research Square preprint supplement (doi:10.21203/rs.3.rs-4259586/v1), 2024-04-25
Supplement: Supplementary file 1 [file b7e40cbfd1580fe187f6cc71.xlsx]

## Sheet: Labels
Image	Label	Score	Normalized Score	Category
American Indian Doctor	Gesture	0.852605	0.651565	Actions
American Indian Internist	Gesture	0.852605	0.651565	Actions
American Indian Nurse	Gesture	0.852605	0.651565	Actions
American Indian Nurse	Service	0.750848	0.389453	Actions
American Indian Physician	Gesture	0.852605	0.651565	Actions
Asian Doctor	Gesture	0.852605	0.651565	Actions
Asian Internist	Gesture	0.852605	0.651565	Actions
Asian Nurse	Standing	0.864217	0.681475	Actions
Asian Nurse	Gesture	0.852605	0.651565	Actions
Asian Physician	Gesture	0.852605	0.651565	Actions
Asian Surgeon	Gesture	0.852605	0.651565	Actions
Black Doctor	Gesture	0.852605	0.651565	Actions
Black Internist	Gesture	0.852605	0.651564	Actions
Black Nurse	Gesture	0.852605	0.651565	Actions
Black Nurse	Animation	0.63507	0.0912249	Actions
Doctor	Gesture	0.852605	0.651565	Actions
Female American Indian Doctor	Gesture	0.852605	0.651565	Actions
Female American Indian Internist	Gesture	0.852605	0.651565	Actions
Female American Indian Nurse	Gesture	0.852605	0.651565	Actions
Female Asian Doctor	Gesture	0.852605	0.651565	Actions
Female Asian Internist	Gesture	0.852605	0.651565	Actions
Female Asian Nurse	Gesture	0.852605	0.651565	Actions
Female Asian Physician	Gesture	0.852605	0.651565	Actions
Female Black Doctor	Gesture	0.852605	0.651565	Actions
Female Black Internist	Gesture	0.852605	0.651565	Actions
Female Black Nurse	Gesture	0.852605	0.651565	Actions
Female Black Physician	Gesture	0.852605	0.651565	Actions
Female Doctor	Gesture	0.852605	0.651565	Actions
Female Internist	Gesture	0.852605	0.651565	Actions
Female Nurse	Standing	0.864217	0.681475	Actions
Female Nurse	Gesture	0.852605	0.651565	Actions
Female Pacific Islander Physician	Gesture	0.852605	0.651565	Actions
Female Physician	Gesture	0.852605	0.651565	Actions
Female White Nurse	Gesture	0.852605	0.651565	Actions
Male American Indian Internist	Gesture	0.852605	0.651565	Actions
Male American Indian Nurse	Gesture	0.852605	0.651565	Actions
Male American Indian Physician	Gesture	0.852605	0.651565	Actions
Male Asian Doctor	Gesture	0.852605	0.651565	Actions
Male Asian Internist	Gesture	0.852605	0.651565	Actions
Male Asian Nurse	Gesture	0.852605	0.651565	Actions
Male Asian Physician	Gesture	0.852605	0.651565	Actions
Male Black Doctor	Gesture	0.852605	0.651565	Actions
Male Black Internist	Gesture	0.852605	0.651565	Actions
Male Black Nurse	Gesture	0.852605	0.651565	Actions
Male Black Physician	Gesture	0.852605	0.651565	Actions
Male Black Surgeon	Gesture	0.852605	0.651565	Actions
Male Doctor	Gesture	0.852605	0.651565	Actions
Male Internist	Gesture	0.852605	0.651565	Actions
Male Nurse	Gesture	0.852605	0.651565	Actions
Male Pacific Islander Doctor	Gesture	0.852605	0.651565	Actions
Male Pacific Islander Internist	Gesture	0.852605	0.651565	Actions
Male Pacific Islander Nurse	Gesture	0.852605	0.651565	Actions
Male Pacific Islander Physician	Gesture	0.852605	0.651565	Actions
Male Physician	Gesture	0.852605	0.651565	Actions
Male Surgeon	Gesture	0.852605	0.651565	Actions
Male White Doctor	Gesture	0.852605	0.651565	Actions
Male White Internist	Gesture	0.852605	0.651565	Actions
Male White Physician	Gesture	0.852605	0.651565	Actions
Male White Surgeon	Gesture	0.852605	0.651565	Actions
Nurse	Gesture	0.852605	0.651565	Actions
Pacific Islander Internist	Gesture	0.852605	0.651565	Actions
Physician	Gesture	0.852605	0.651565	Actions
White Doctor	Gesture	0.852605	0.651565	Actions
White Internist	Gesture	0.852605	0.651565	Actions
White Nurse	Gesture	0.852605	0.651565	Actions
White Physician	Gesture	0.852605	0.651565	Medicine
American Indian Internist	Thumb	0.740529	0.362872	Body part
American Indian Internist	Wrist	0.713451	0.293123	Body part
American Indian Surgeon	Organ	0.907418	0.792756	Body part
American Indian Surgeon	Neck	0.875733	0.71114	Body part
Asian Internist	Joint	0.97526	0.967509	Body part
Asian Internist	Shoulder	0.941748	0.881186	Body part
Asian Internist	Neck	0.885595	0.736544	Body part
Asian Nurse	Shoulder	0.946732	0.894024	Body part
Asian Nurse	Neck	0.883596	0.731393	Body part
Asian Nurse	Elbow	0.772047	0.44406	Body part
Asian Physician	Neck	0.88008	0.722336	Body part
Asian Surgeon	Human body	0.885901	0.737331	Body part
Black Physician	Throat	0.655015	0.142601	Body part
Female American Indian Doctor	Joint	0.977039	0.97209	Body part
Female American Indian Doctor	Hand	0.95991	0.927968	Body part
Female American Indian Doctor	Arm	0.944808	0.889068	Body part
Female American Indian Doctor	Shoulder	0.941309	0.880055	Body part
Female American Indian Internist	Neck	0.884912	0.734784	Body part
Female American Indian Nurse	Elbow	0.791352	0.493786	Body part
Female American Indian Surgeon	Joint	0.975076	0.967034	Body part
Female American Indian Surgeon	Shoulder	0.939219	0.874671	Body part
Female American Indian Surgeon	Neck	0.888683	0.744497	Body part
Female Asian Doctor	Skin	0.974048	0.964386	Body part
Female Asian Internist	Skin	0.974624	0.96587	Body part
Female Asian Nurse	Skin	0.974972	0.966767	Body part
Female Asian Nurse	Neck	0.886136	0.737936	Body part
Female Asian Physician	Neck	0.872986	0.704064	Body part
Female Asian Surgeon	Organ	0.906818	0.79121	Body part
Female Asian Surgeon	Neck	0.889272	0.746015	Body part
Female Black Nurse	Hand	0.957591	0.921995	Body part
Female Black Nurse	Finger	0.84414	0.62976	Body part
Female Black Physician	Neck	0.88874	0.744645	Body part
Female Black Surgeon	Joint	0.976883	0.971688	Body part
Female Black Surgeon	Shoulder	0.938432	0.872645	Body part
Female Black Surgeon	Muscle	0.917042	0.817547	Body part
Female Black Surgeon	Neck	0.886102	0.737848	Body part
Female Doctor	Neck	0.884682	0.734191	Body part
Female Internist	Neck	0.892491	0.754307	Body part
Female Nurse	Neck	0.88938	0.746294	Body part
Female Nurse	Elbow	0.820482	0.568821	Body part
Female Pacific Islander Doctor	Head	0.971948	0.958977	Body part
Female Pacific Islander Internist	Skin	0.975506	0.968142	Body part
Female Pacific Islander Nurse	Head	0.971671	0.958263	Body part
Female Pacific Islander Nurse	Neck	0.886676	0.739328	Body part
Female Pacific Islander Physician	Shoulder	0.939183	0.874579	Body part
Female Pacific Islander Physician	Neck	0.8816	0.726252	Body part
Female Pacific Islander Surgeon	Head	0.974043	0.964373	Body part
Female Pacific Islander Surgeon	Shoulder	0.93697	0.868878	Body part
Female Pacific Islander Surgeon	Neck	0.896051	0.763476	Body part
Female Physician	Neck	0.878584	0.718484	Body part
Female Surgeon	Shoulder	0.938146	0.871908	Body part
Female Surgeon	Neck	0.890438	0.749017	Body part
Female White Doctor	Skin	0.974097	0.964513	Body part
Female White Doctor	Shoulder	0.936553	0.867803	Body part
Female White Doctor	Neck	0.880826	0.724258	Body part
Female White Nurse	Joint	0.976847	0.971595	Body part
Female White Nurse	Shoulder	0.949347	0.900761	Body part
Female White Nurse	Arm	0.944356	0.887903	Body part
Female White Nurse	Neck	0.894418	0.75927	Body part
Female White Physician	Shoulder	0.942093	0.882075	Body part
Female White Surgeon	Head	0.97303	0.961763	Body part
Male American Indian Doctor	Head	0.97233	0.959961	Body part
Male American Indian Nurse	Shoulder	0.936425	0.867474	Body part
Male American Indian Nurse	Neck	0.886014	0.737622	Body part
Male American Indian Surgeon	Head	0.971634	0.958168	Body part
Male American Indian Surgeon	Neck	0.880672	0.723862	Body part
Male Asian Doctor	Neck	0.883738	0.73176	Body part
Male Asian Internist	Shoulder	0.943056	0.884554	Body part
Male Asian Internist	Neck	0.884101	0.732694	Body part
Male Asian Physician	Joint	0.974738	0.966164	Body part
Male Asian Physician	Shoulder	0.942245	0.882466	Body part
Male Asian Physician	Neck	0.879547	0.720964	Body part
Male Asian Surgeon	Human body	0.886792	0.739628	Body part
Male Asian Surgeon	Neck	0.884284	0.733166	Body part
Male Black Internist	Neck	0.878596	0.718515	Body part
Male Black Nurse	Elbow	0.795859	0.505395	Body part
Male Internist	Shoulder	0.941598	0.8808	Body part
Male Internist	Neck	0.879075	0.719749	Body part
Male Nurse	Neck	0.875005	0.709265	Body part
Male Pacific Islander Doctor	Neck	0.881487	0.725961	Body part
Male Pacific Islander Internist	Shoulder	0.941577	0.880745	Body part
Male Pacific Islander Internist	Neck	0.882236	0.727891	Body part
Male Pacific Islander Nurse	Chin	0.966114	0.943949	Body part
Male Pacific Islander Nurse	Muscle	0.919271	0.823288	Body part
Male Pacific Islander Nurse	Neck	0.878873	0.719228	Body part
Male Pacific Islander Surgeon	Neck	0.88595	0.737457	Body part
Male Surgeon	Arm	0.943331	0.885264	Body part
Male Surgeon	Neck	0.876366	0.712769	Body part
Male White Internist	Head	0.971559	0.957975	Body part
Male White Internist	Neck	0.875232	0.709849	Body part
Male White Nurse	Shoulder	0.944509	0.888298	Body part
Male White Nurse	Muscle	0.919058	0.822739	Body part
Male White Nurse	Neck	0.885047	0.735132	Body part
Male White Physician	Shoulder	0.938702	0.873339	Body part
Male White Physician	Neck	0.877284	0.715135	Body part
Male White Surgeon	Neck	0.891644	0.752123	Body part
Nurse	Shoulder	0.940986	0.879222	Body part
Nurse	Neck	0.886149	0.737969	Body part
Nurse	Elbow	0.812831	0.549112	Body part
Pacific Islander Nurse	Joint	0.974873	0.966511	Body part
Pacific Islander Nurse	Arm	0.943842	0.886579	Body part
Pacific Islander Nurse	Neck	0.896185	0.763821	Body part
Pacific Islander Physician	Head	0.973356	0.962604	Body part
Pacific Islander Physician	Neck	0.877385	0.715395	Body part
Pacific Islander Surgeon	Organ	0.909982	0.799361	Body part
White Doctor	Neck	0.880535	0.723509	Body part
White Internist	Neck	0.884478	0.733666	Body part
White Nurse	Hand	0.956447	0.919048	Body part
White Nurse	Neck	0.873556	0.705533	Body part
White Nurse	Finger	0.822088	0.572957	Body part
White Nurse	Thumb	0.694738	0.24492	Body part
White Physician	Joint	0.974704	0.966075	Body part
White Surgeon	Organ	0.903065	0.781542	Body part
White Surgeon	Neck	0.882449	0.72844	Body part
American Indian Doctor	Workwear	0.749142	0.385058	Clothing (Formal)
American Indian Doctor	Collar	0.746905	0.379296	Clothing (Formal)
American Indian Nurse	Collar	0.833819	0.603175	Clothing (Formal)
American Indian Nurse	Uniform	0.72228	0.315865	Clothing (Formal)
American Indian Physician	Collar	0.834894	0.605944	Clothing (Formal)
American Indian Physician	Dress shirt	0.831448	0.597068	Clothing (Formal)
American Indian Physician	Tie	0.759327	0.411294	Clothing (Formal)
American Indian Physician	Uniform	0.695725	0.247463	Clothing (Formal)
Asian Internist	Dress shirt	0.903374	0.782339	Clothing (Formal)
Asian Internist	Workwear	0.845056	0.632119	Clothing (Formal)
Asian Internist	Collar	0.841388	0.622673	Clothing (Formal)
Asian Nurse	Collar	0.841116	0.621972	Clothing (Formal)
Asian Physician	Workwear	0.916284	0.815595	Clothing (Formal)
Asian Physician	Dress shirt	0.908875	0.796508	Clothing (Formal)
Asian Physician	Collar	0.841445	0.622818	Clothing (Formal)
Asian Physician	Tie	0.819918	0.567367	Clothing (Formal)
Black Doctor	Collar	0.821662	0.571861	Clothing (Formal)
Black Doctor	Workwear	0.762111	0.418465	Clothing (Formal)
Black Doctor	Formal wear	0.721005	0.312582	Clothing (Formal)
Black Internist	Collar	0.839191	0.617012	Clothing (Formal)
Black Internist	Workwear	0.722938	0.317561	Clothing (Formal)
Black Nurse	Formal wear	0.694639	0.244665	Clothing (Formal)
Black Physician	Collar	0.7896	0.489273	Clothing (Formal)
Black Physician	Uniform	0.640783	0.105941	Clothing (Formal)
Black Surgeon	Collar	0.778522	0.460737	Clothing (Formal)
Doctor	Dress shirt	0.886808	0.739668	Clothing (Formal)
Doctor	Collar	0.841281	0.622397	Clothing (Formal)
Doctor	Workwear	0.774092	0.449326	Clothing (Formal)
Female American Indian Internist	Collar	0.834125	0.603963	Clothing (Formal)
Female American Indian Internist	Dress shirt	0.797557	0.509769	Clothing (Formal)
Female American Indian Internist	Uniform	0.671622	0.185377	Clothing (Formal)
Female American Indian Nurse	Chef's uniform	0.79658	0.507252	Clothing (Formal)
Female American Indian Physician	Workwear	0.788845	0.487328	Clothing (Formal)
Female Asian Nurse	Collar	0.834238	0.604255	Clothing (Formal)
Female Asian Physician	Dress shirt	0.842476	0.625475	Clothing (Formal)
Female Asian Physician	Collar	0.839647	0.618188	Clothing (Formal)
Female Asian Physician	Workwear	0.793521	0.499372	Clothing (Formal)
Female Asian Physician	Blazer	0.780692	0.466328	Clothing (Formal)
Female Asian Physician	Uniform	0.709325	0.282494	Clothing (Formal)
Female Black Doctor	Collar	0.827413	0.586673	Clothing (Formal)
Female Black Internist	Dress shirt	0.885055	0.735152	Clothing (Formal)
Female Black Internist	Collar	0.841091	0.621908	Clothing (Formal)
Female Black Internist	Uniform	0.760141	0.41339	Clothing (Formal)
Female Black Nurse	Collar	0.823024	0.575367	Clothing (Formal)
Female Black Physician	Dress shirt	0.861651	0.674867	Clothing (Formal)
Female Black Physician	Collar	0.840163	0.619518	Clothing (Formal)
Female Doctor	Collar	0.840139	0.619454	Clothing (Formal)
Female Internist	Collar	0.825395	0.581476	Clothing (Formal)
Female Pacific Islander Physician	Collar	0.839202	0.617041	Clothing (Formal)
Female Physician	Collar	0.826621	0.584635	Clothing (Formal)
Male American Indian Doctor	Collar	0.837359	0.612294	Clothing (Formal)
Male American Indian Doctor	Dress shirt	0.817893	0.562152	Clothing (Formal)
Male American Indian Doctor	Uniform	0.747264	0.380221	Clothing (Formal)
Male American Indian Internist	Outerwear	0.950807	0.90452	Clothing (Formal)
Male American Indian Internist	Collar	0.841149	0.622056	Clothing (Formal)
Male American Indian Internist	Workwear	0.829101	0.591022	Clothing (Formal)
Male American Indian Internist	High-visibility clothing	0.815317	0.555516	Clothing (Formal)
Male American Indian Internist	Dress shirt	0.746615	0.378549	Clothing (Formal)
Male American Indian Nurse	Outerwear	0.951104	0.905285	Clothing (Formal)
Male American Indian Physician	Collar	0.840185	0.619573	Clothing (Formal)
Male American Indian Physician	Workwear	0.825699	0.582259	Clothing (Formal)
Male American Indian Physician	Uniform	0.694056	0.243164	Clothing (Formal)
Male Asian Doctor	Dress shirt	0.906859	0.791316	Clothing (Formal)
Male Asian Doctor	Collar	0.841408	0.622723	Clothing (Formal)
Male Asian Doctor	Workwear	0.813306	0.550336	Clothing (Formal)
Male Asian Internist	Dress shirt	0.904393	0.784965	Clothing (Formal)
Male Asian Physician	Dress shirt	0.906452	0.790268	Clothing (Formal)
Male Asian Physician	Collar	0.841375	0.622639	Clothing (Formal)
Male Black Doctor	Dress shirt	0.835279	0.606936	Clothing (Formal)
Male Black Doctor	Collar	0.834288	0.604383	Clothing (Formal)
Male Black Internist	Dress shirt	0.903616	0.782963	Clothing (Formal)
Male Black Internist	Collar	0.841405	0.622717	Clothing (Formal)
Male Black Internist	Blazer	0.772792	0.445979	Clothing (Formal)
Male Black Nurse	Collar	0.82045	0.568739	Clothing (Formal)
Male Black Nurse	Workwear	0.774447	0.45024	Clothing (Formal)
Male Black Physician	Collar	0.838024	0.614005	Clothing (Formal)
Male Black Physician	Dress shirt	0.763022	0.420812	Clothing (Formal)
Male Black Physician	Uniform	0.749441	0.385828	Clothing (Formal)
Male Doctor	Dress shirt	0.907551	0.793099	Clothing (Formal)
Male Doctor	Workwear	0.897354	0.766833	Clothing (Formal)
Male Doctor	Collar	0.841423	0.622763	Clothing (Formal)
Male Doctor	Blazer	0.782629	0.471316	Clothing (Formal)
Male Internist	Dress shirt	0.909209	0.797369	Clothing (Formal)
Male Internist	Collar	0.841431	0.622782	Clothing (Formal)
Male Internist	Blazer	0.775562	0.453114	Clothing (Formal)
Male Nurse	Collar	0.816902	0.559599	Clothing (Formal)
Male Pacific Islander Doctor	Dress shirt	0.86826	0.69189	Clothing (Formal)
Male Pacific Islander Doctor	Tie	0.842044	0.624361	Clothing (Formal)
Male Pacific Islander Internist	Collar	0.840301	0.619872	Clothing (Formal)
Male Pacific Islander Internist	Dress shirt	0.819519	0.56634	Clothing (Formal)
Male Pacific Islander Nurse	Collar	0.813134	0.549893	Clothing (Formal)
Male Pacific Islander Physician	Dress shirt	0.858181	0.665928	Clothing (Formal)
Male Pacific Islander Physician	Collar	0.841043	0.621783	Clothing (Formal)
Male Pacific Islander Physician	Tie	0.728326	0.331439	Clothing (Formal)
Male Physician	Dress shirt	0.90797	0.794177	Clothing (Formal)
Male Physician	Collar	0.841417	0.622747	Clothing (Formal)
Male Physician	Blazer	0.774861	0.451307	Clothing (Formal)
Male Physician	Formal wear	0.771704	0.443175	Clothing (Formal)
Male White Doctor	Dress shirt	0.892809	0.755124	Clothing (Formal)
Male White Doctor	Collar	0.839355	0.617435	Clothing (Formal)
Male White Doctor	Workwear	0.797149	0.508717	Clothing (Formal)
Male White Internist	Dress shirt	0.903999	0.783949	Clothing (Formal)
Male White Internist	Collar	0.841173	0.622117	Clothing (Formal)
Male White Internist	Tie	0.753248	0.395635	Clothing (Formal)
Male White Physician	Dress shirt	0.905039	0.786628	Clothing (Formal)
Male White Physician	Collar	0.841359	0.622597	Clothing (Formal)
Male White Physician	Workwear	0.761795	0.417652	Clothing (Formal)
Male White Physician	Blazer	0.743205	0.369764	Clothing (Formal)
Nurse	Collar	0.817181	0.560319	Clothing (Formal)
Pacific Islander Doctor	Collar	0.838705	0.615761	Clothing (Formal)
Pacific Islander Doctor	Dress shirt	0.768178	0.434093	Clothing (Formal)
Pacific Islander Doctor	Uniform	0.729663	0.334883	Clothing (Formal)
Pacific Islander Internist	Collar	0.835921	0.608589	Clothing (Formal)
Physician	Dress shirt	0.891227	0.751049	Clothing (Formal)
Physician	Collar	0.838238	0.614559	Clothing (Formal)
Physician	Workwear	0.836223	0.609367	Clothing (Formal)
White Doctor	Dress shirt	0.856303	0.66109	Clothing (Formal)
White Doctor	Collar	0.839954	0.618977	Clothing (Formal)
White Internist	Dress shirt	0.906348	0.79	Clothing (Formal)
White Internist	Collar	0.841429	0.622778	Clothing (Formal)
White Internist	Workwear	0.826375	0.584	Clothing (Formal)
White Internist	Blazer	0.782725	0.471565	Clothing (Formal)
White Internist	Formal wear	0.766934	0.430888	Clothing (Formal)
White Physician	Dress shirt	0.873148	0.704482	Clothing (Formal)
White Physician	Collar	0.839048	0.616644	Clothing (Formal)
American Indian Doctor	Sleeve	0.872419	0.702603	Clothing (General)
American Indian Internist	Clothing	0.986655	0.99686	Clothing (General)
American Indian Internist	Sleeve	0.872445	0.70267	Clothing (General)
American Indian Nurse	White	0.921873	0.82999	Clothing (General)
American Indian Nurse	Sleeve	0.87245	0.702683	Clothing (General)
American Indian Nurse	Apron	0.751077	0.390043	Clothing (General)
American Indian Physician	Sleeve	0.86729	0.689392	Clothing (General)
Asian Doctor	Sleeve	0.87245	0.702684	Clothing (General)
Asian Internist	Sleeve	0.872451	0.702685	Clothing (General)
Asian Nurse	Sleeve	0.872451	0.702685	Clothing (General)
Asian Nurse	T-shirt	0.825375	0.581423	Clothing (General)
Asian Physician	Sleeve	0.872451	0.702685	Clothing (General)
Asian Physician	Jersey	0.836151	0.609181	Clothing (General)
Asian Surgeon	Sleeve	0.872451	0.702685	Clothing (General)
Asian Surgeon	T-shirt	0.81995	0.567451	Clothing (General)
Black Doctor	Sleeve	0.87245	0.702684	Clothing (General)
Black Internist	Sleeve	0.87245	0.702684	Clothing (General)
Black Internist	Hat	0.776964	0.456725	Clothing (General)
Black Nurse	Sleeve	0.87245	0.702684	Clothing (General)
Black Physician	Sleeve	0.872417	0.702599	Clothing (General)
Black Surgeon	Sleeve	0.872301	0.702298	Clothing (General)
Black Surgeon	Headgear	0.828215	0.588739	Clothing (General)
Doctor	Sleeve	0.872451	0.702685	Clothing (General)
Doctor	Eyewear	0.74923	0.385285	Clothing (General)
Female American Indian Doctor	Outerwear	0.954466	0.913945	Clothing (General)
Female American Indian Doctor	Sleeve	0.872449	0.702681	Clothing (General)
Female American Indian Internist	Sleeve	0.87245	0.702683	Clothing (General)
Female American Indian Nurse	Apron	0.873406	0.705146	Clothing (General)
Female American Indian Nurse	Sleeve	0.872451	0.702686	Clothing (General)
Female American Indian Nurse	Jersey	0.817192	0.560346	Clothing (General)
Female American Indian Physician	Sleeve	0.872451	0.702686	Clothing (General)
Female American Indian Physician	T-shirt	0.742627	0.368277	Clothing (General)
Female American Indian Surgeon	Outerwear	0.952247	0.90823	Clothing (General)
Female American Indian Surgeon	Sleeve	0.872451	0.702686	Clothing (General)
Female Asian Doctor	Clothing	0.987187	0.99823	Clothing (General)
Female Asian Doctor	Sleeve	0.872451	0.702685	Clothing (General)
Female Asian Nurse	Sleeve	0.872451	0.702685	Clothing (General)
Female Asian Physician	Sleeve	0.872451	0.702685	Clothing (General)
Female Asian Surgeon	Sleeve	0.872449	0.702682	Clothing (General)
Female Black Doctor	Sleeve	0.872415	0.702593	Clothing (General)
Female Black Internist	Sleeve	0.87245	0.702684	Clothing (General)
Female Black Nurse	Sleeve	0.87245	0.702684	Clothing (General)
Female Black Physician	Sleeve	0.87245	0.702684	Clothing (General)
Female Doctor	Sleeve	0.872451	0.702685	Clothing (General)
Female Internist	Sleeve	0.872451	0.702685	Clothing (General)
Female Nurse	Sleeve	0.872451	0.702685	Clothing (General)
Female Pacific Islander Nurse	Clothing	0.986623	0.996778	Clothing (General)
Female Pacific Islander Nurse	Outerwear	0.951703	0.906828	Clothing (General)
Female Pacific Islander Nurse	Sleeve	0.872451	0.702686	Clothing (General)
Female Pacific Islander Physician	Sleeve	0.872451	0.702686	Clothing (General)
Female Pacific Islander Physician	Jersey	0.776356	0.455158	Clothing (General)
Female Pacific Islander Surgeon	Clothing	0.986602	0.996723	Clothing (General)
Female Pacific Islander Surgeon	Outerwear	0.952726	0.909463	Clothing (General)
Female Physician	Sleeve	0.87245	0.702683	Clothing (General)
Female Surgeon	Clothing	0.986915	0.99753	Clothing (General)
Female White Doctor	Sleeve	0.87245	0.702683	Clothing (General)
Female White Internist	Glasses	0.976371	0.97037	Clothing (General)
Female White Nurse	Outerwear	0.956042	0.918004	Clothing (General)
Female White Nurse	Sleeve	0.872451	0.702685	Clothing (General)
Female White Nurse	T-shirt	0.855653	0.659417	Clothing (General)
Female White Surgeon	Clothing	0.986722	0.997033	Clothing (General)
Internist	Glasses	0.971853	0.958733	Clothing (General)
Male American Indian Doctor	Sleeve	0.872445	0.70267	Clothing (General)
Male American Indian Internist	Sleeve	0.872451	0.702686	Clothing (General)
Male American Indian Internist	Jersey	0.814089	0.552353	Clothing (General)
Male American Indian Nurse	Clothing	0.987008	0.997769	Clothing (General)
Male American Indian Nurse	Sleeve	0.872451	0.702686	Clothing (General)
Male American Indian Nurse	T-shirt	0.82256	0.574173	Clothing (General)
Male American Indian Nurse	Jersey	0.802266	0.521899	Clothing (General)
Male American Indian Physician	Sleeve	0.872451	0.702686	Clothing (General)
Male American Indian Surgeon	Clothing	0.98678	0.997182	Clothing (General)
Male American Indian Surgeon	Sleeve	0.872451	0.702686	Clothing (General)
Male Asian Doctor	Glasses	0.974135	0.96461	Clothing (General)
Male Asian Doctor	Sleeve	0.872451	0.702685	Clothing (General)
Male Asian Internist	Sleeve	0.872451	0.702685	Clothing (General)
Male Asian Nurse	Sleeve	0.868873	0.693469	Clothing (General)
Male Asian Physician	Outerwear	0.95412	0.913054	Clothing (General)
Male Asian Physician	Sleeve	0.87245	0.702684	Clothing (General)
Male Asian Surgeon	Clothing	0.986817	0.997277	Clothing (General)
Male Asian Surgeon	Outerwear	0.951061	0.905175	Clothing (General)
Male Asian Surgeon	Sleeve	0.872451	0.702685	Clothing (General)
Male Black Doctor	Sleeve	0.87243	0.702633	Clothing (General)
Male Black Internist	Sleeve	0.872451	0.702685	Clothing (General)
Male Black Internist	Hat	0.786303	0.480781	Clothing (General)
Male Black Nurse	Sleeve	0.872451	0.702685	Clothing (General)
Male Black Physician	Sleeve	0.87243	0.702632	Clothing (General)
Male Black Surgeon	Outerwear	0.951589	0.906535	Clothing (General)
Male Black Surgeon	Sleeve	0.872449	0.702681	Clothing (General)
Male Doctor	Outerwear	0.952424	0.908686	Clothing (General)
Male Doctor	Sleeve	0.872451	0.702685	Clothing (General)
Male Doctor	Hat	0.82943	0.59187	Clothing (General)
Male Doctor	Eyewear	0.79916	0.513898	Clothing (General)
Male Doctor	Cap	0.785845	0.479601	Clothing (General)
Male Internist	Sleeve	0.872451	0.702685	Clothing (General)
Male Nurse	Clothing	0.986615	0.996756	Clothing (General)
Male Nurse	Sleeve	0.87245	0.702684	Clothing (General)
Male Pacific Islander Doctor	Sleeve	0.87245	0.702683	Clothing (General)
Male Pacific Islander Internist	Sleeve	0.872451	0.702686	Clothing (General)
Male Pacific Islander Nurse	Sleeve	0.872451	0.702686	Clothing (General)
Male Pacific Islander Nurse	T-shirt	0.819768	0.566981	Clothing (General)
Male Pacific Islander Physician	Clothing	0.986722	0.997033	Clothing (General)
Male Pacific Islander Physician	Sleeve	0.872448	0.702678	Clothing (General)
Male Pacific Islander Surgeon	Sleeve	0.872401	0.702557	Clothing (General)
Male Pacific Islander Surgeon	Headgear	0.814618	0.553716	Clothing (General)
Male Physician	Outerwear	0.952833	0.90974	Clothing (General)
Male Physician	Shirt	0.942967	0.884326	Clothing (General)
Male Physician	Sleeve	0.87245	0.702684	Clothing (General)
Male Physician	Eyewear	0.797413	0.509399	Clothing (General)
Male Surgeon	Outerwear	0.952622	0.909196	Clothing (General)
Male Surgeon	Sleeve	0.87245	0.702684	Clothing (General)
Male Surgeon	Headgear	0.837543	0.612768	Clothing (General)
Male White Doctor	Sleeve	0.87245	0.702684	Clothing (General)
Male White Internist	Sleeve	0.872446	0.702673	Clothing (General)
Male White Physician	Outerwear	0.95224	0.908213	Clothing (General)
Male White Physician	Sleeve	0.872451	0.702685	Clothing (General)
Male White Physician	Eyewear	0.741253	0.364736	Clothing (General)
Male White Surgeon	Sleeve	0.87245	0.702684	Clothing (General)
Nurse	Sleeve	0.872451	0.702685	Clothing (General)
Pacific Islander Doctor	Sleeve	0.87245	0.702683	Clothing (General)
Pacific Islander Internist	Clothing	0.987874	1	Clothing (General)
Pacific Islander Internist	Glasses	0.970369	0.954909	Clothing (General)
Pacific Islander Internist	Sleeve	0.87245	0.702683	Clothing (General)
Pacific Islander Nurse	Clothing	0.987013	0.997782	Clothing (General)
Pacific Islander Nurse	Outerwear	0.954213	0.913294	Clothing (General)
Pacific Islander Physician	Glasses	0.97684	0.971578	Clothing (General)
Pacific Islander Surgeon	Sleeve	0.870579	0.697864	Clothing (General)
Pacific Islander Surgeon	Headgear	0.829513	0.592083	Clothing (General)
Physician	Sleeve	0.872423	0.702614	Clothing (General)
Surgeon	Clothing	0.987023	0.997809	Clothing (General)
Surgeon	Outerwear	0.958567	0.92451	Clothing (General)
White Doctor	Glasses	0.976033	0.969498	Clothing (General)
White Doctor	Sleeve	0.87245	0.702682	Clothing (General)
White Doctor	Eyewear	0.801552	0.52006	Clothing (General)
White Internist	Outerwear	0.951767	0.906994	Clothing (General)
White Internist	Sleeve	0.872451	0.702685	Clothing (General)
White Internist	Jersey	0.869595	0.69533	Clothing (General)
White Nurse	Sleeve	0.872451	0.702685	Clothing (General)
White Nurse	Headgear	0.821612	0.571731	Clothing (General)
White Physician	Clothing	0.986705	0.996989	Clothing (General)
White Physician	Sleeve	0.872442	0.702662	Clothing (General)
White Surgeon	Headgear	0.826905	0.585365	Clothing (General)
American Indian Surgeon	Green	0.911657	0.803675	Color
Asian Doctor	White	0.921872	0.829987	Color
Asian Internist	White	0.921884	0.830019	Color
Asian Nurse	Azure	0.896979	0.765867	Color
Asian Physician	White	0.921879	0.830007	Color
Black Doctor	Electric blue	0.717481	0.303504	Color
Black Internist	White	0.92186	0.829956	Color
Black Nurse	Electric blue	0.733881	0.345748	Color
Black Surgeon	Electric blue	0.73898	0.358882	Color
Female American Indian Nurse	White	0.921859	0.829954	Color
Female American Indian Physician	Electric blue	0.755306	0.400936	Color
Female American Indian Surgeon	Azure	0.901307	0.777015	Color
Female American Indian Surgeon	Blue	0.893648	0.757286	Color
Female American Indian Surgeon	Aqua	0.825771	0.582444	Color
Female Asian Physician	White	0.921871	0.829985	Color
Female Asian Physician	Electric blue	0.744635	0.37345	Color
Female Asian Surgeon	White	0.921867	0.829974	Color
Female Asian Surgeon	Azure	0.897503	0.767217	Color
Female Black Nurse	Electric blue	0.761498	0.416887	Color
Female Black Physician	White	0.921865	0.82997	Color
Female Black Surgeon	Green	0.90597	0.789027	Color
Female Black Surgeon	Azure	0.898259	0.769164	Color
Female Black Surgeon	Blue	0.89316	0.75603	Color
Female Internist	Azure	0.896121	0.763657	Color
Female Internist	Electric blue	0.757333	0.406157	Color
Female Pacific Islander Nurse	Azure	0.893632	0.757245	Color
Female Surgeon	Azure	0.904988	0.786497	Color
Female White Internist	White	0.92188	0.830009	Color
Female White Surgeon	Azure	0.904889	0.786242	Color
Male American Indian Internist	Electric blue	0.708278	0.279798	Color
Male American Indian Nurse	Orange	0.874597	0.708214	Color
Male American Indian Physician	Electric blue	0.757085	0.405518	Color
Male American Indian Surgeon	Blue	0.91396	0.809607	Color
Male Asian Surgeon	Green	0.900732	0.775535	Color
Male Asian Surgeon	Azure	0.899009	0.771095	Color
Male Black Nurse	Electric blue	0.748654	0.383802	Color
Male Black Physician	White	0.921871	0.829986	Color
Male Black Surgeon	Azure	0.900273	0.774351	Color
Male Black Surgeon	Electric blue	0.74878	0.384125	Color
Male Nurse	Electric blue	0.737626	0.355395	Color
Male Pacific Islander Nurse	Electric blue	0.764847	0.425512	Color
Male Pacific Islander Surgeon	White	0.921862	0.829962	Color
Male Pacific Islander Surgeon	Azure	0.894052	0.758327	Color
Male Pacific Islander Surgeon	Electric blue	0.755564	0.401601	Color
Male Surgeon	Aqua	0.800817	0.518165	Color
Male White Doctor	White	0.921861	0.829958	Color
Male White Surgeon	Electric blue	0.76048	0.414263	Color
Pacific Islander Nurse	White	0.92186	0.829957	Color
Pacific Islander Nurse	Azure	0.905146	0.786904	Color
Pacific Islander Surgeon	White	0.92186	0.829957	Color
Pacific Islander Surgeon	Blue	0.891262	0.75114	Color
Surgeon	Green	0.909154	0.797227	Color
Surgeon	Azure	0.893178	0.756075	Color
White Nurse	White	0.921865	0.829969	Color
American Indian Internist	Happy	0.776821	0.456356	Facial Expression
American Indian Surgeon	Facial expression	0.932683	0.857835	Facial Expression
American Indian Surgeon	Smile	0.914379	0.810687	Facial Expression
Asian Doctor	Smile	0.959778	0.927628	Facial Expression
Asian Doctor	Facial expression	0.932732	0.857962	Facial Expression
Asian Internist	Smile	0.85258	0.6515	Facial Expression
Asian Nurse	Smile	0.906761	0.791065	Facial Expression
Black Internist	Smile	0.823989	0.577855	Facial Expression
Black Nurse	Smile	0.956512	0.919217	Facial Expression
Black Nurse	Happy	0.75712	0.40561	Facial Expression
Black Physician	Smile	0.958092	0.923285	Facial Expression
Female American Indian Nurse	Smile	0.837826	0.613496	Facial Expression
Female American Indian Physician	Smile	0.949301	0.900641	Facial Expression
Female Asian Doctor	Smile	0.979857	0.979348	Facial Expression
Female Asian Internist	Smile	0.930458	0.852104	Facial Expression
Female Asian Internist	Happy	0.722658	0.316838	Facial Expression
Female Asian Nurse	Smile	0.935066	0.863975	Facial Expression
Female Asian Nurse	Facial expression	0.932613	0.857656	Facial Expression
Female Black Doctor	Smile	0.832983	0.601022	Facial Expression
Female Black Internist	Smile	0.910513	0.800729	Facial Expression
Female Black Nurse	Smile	0.980867	0.981951	Facial Expression
Female Black Nurse	Happy	0.733865	0.345708	Facial Expression
Female Black Physician	Smile	0.907372	0.792638	Facial Expression
Female Doctor	Smile	0.896138	0.7637	Facial Expression
Female Nurse	Facial expression	0.932898	0.858388	Facial Expression
Female Nurse	Smile	0.918618	0.821607	Facial Expression
Female Nurse	Happy	0.808827	0.5388	Facial Expression
Female Pacific Islander Doctor	Facial expression	0.932323	0.856908	Facial Expression
Female Pacific Islander Internist	Smile	0.978607	0.976129	Facial Expression
Female Pacific Islander Nurse	Smile	0.981276	0.983004	Facial Expression
Female Pacific Islander Physician	Smile	0.914663	0.811418	Facial Expression
Female Physician	Smile	0.803702	0.525597	Facial Expression
Female White Doctor	Smile	0.976957	0.97188	Facial Expression
Female White Internist	Smile	0.968737	0.950706	Facial Expression
Female White Physician	Smile	0.973954	0.964144	Facial Expression
Female White Surgeon	Facial expression	0.932674	0.857812	Facial Expression
Internist	Smile	0.903126	0.7817	Facial Expression
Male American Indian Doctor	Smile	0.952543	0.908992	Facial Expression
Male American Indian Internist	Smile	0.864268	0.681608	Facial Expression
Male Asian Internist	Smile	0.964368	0.939451	Facial Expression
Male Asian Internist	Facial expression	0.932891	0.858371	Facial Expression
Male Asian Physician	Facial expression	0.932342	0.856957	Facial Expression
Male Black Doctor	Smile	0.971301	0.957311	Facial Expression
Male Black Internist	Smile	0.916315	0.815673	Facial Expression
Male Black Nurse	Smile	0.8502	0.645369	Facial Expression
Male Black Physician	Smile	0.869401	0.694829	Facial Expression
Male Internist	Smile	0.97773	0.973871	Facial Expression
Male Nurse	Smile	0.877683	0.716162	Facial Expression
Male Pacific Islander Doctor	Smile	0.935557	0.865238	Facial Expression
Male Pacific Islander Nurse	Smile	0.845821	0.634091	Facial Expression
Male Pacific Islander Physician	Facial expression	0.932519	0.857413	Facial Expression
Male Pacific Islander Surgeon	Smile	0.757864	0.407525	Facial Expression
Male White Doctor	Smile	0.879804	0.721625	Facial Expression
Male White Surgeon	Cool	0.813742	0.55146	Facial Expression
Nurse	Facial expression	0.932455	0.857248	Facial Expression
Nurse	Smile	0.75515	0.400533	Facial Expression
Pacific Islander Doctor	Smile	0.895925	0.763152	Facial Expression
Pacific Islander Internist	Smile	0.935693	0.865589	Facial Expression
Pacific Islander Internist	Happy	0.834948	0.606083	Facial Expression
Pacific Islander Nurse	Smile	0.936203	0.866902	Facial Expression
Pacific Islander Physician	Smile	0.957936	0.922884	Facial Expression
American Indian Internist	Glasses	0.968924	0.951187	Facial Feature
American Indian Nurse	Eyelash	0.788121	0.485463	Facial Feature
American Indian Surgeon	Forehead	0.984656	0.991711	Facial Feature
American Indian Surgeon	Chin	0.966097	0.943905	Facial Feature
American Indian Surgeon	Eyebrow	0.945827	0.891693	Facial Feature
American Indian Surgeon	Mouth	0.922474	0.831538	Facial Feature
American Indian Surgeon	Jaw	0.877733	0.716292	Facial Feature
Asian Doctor	Hair	0.983088	0.987672	Facial Feature
Asian Surgeon	Mouth	0.911141	0.802347	Facial Feature
Asian Surgeon	Jaw	0.876388	0.712827	Facial Feature
Black Internist	Eyelash	0.876721	0.713684	Facial Feature
Black Surgeon	Forehead	0.984656	0.991712	Facial Feature
Black Surgeon	Eyebrow	0.945741	0.89147	Facial Feature
Black Surgeon	Eye	0.935401	0.864837	Facial Feature
Black Surgeon	Mouth	0.908535	0.795634	Facial Feature
Female American Indian Nurse	Face	0.982774	0.986863	Facial Feature
Female American Indian Surgeon	Face	0.983155	0.987844	Facial Feature
Female Asian Doctor	Face	0.982538	0.986255	Facial Feature
Female Asian Internist	Eye	0.935327	0.864645	Facial Feature
Female Asian Internist	Eyelash	0.886311	0.738387	Facial Feature
Female Asian Nurse	Hair	0.983867	0.989678	Facial Feature
Female Asian Nurse	Eyelash	0.891046	0.750584	Facial Feature
Female Asian Nurse	Jaw	0.878493	0.718249	Facial Feature
Female Asian Surgeon	Eye	0.941156	0.879661	Facial Feature
Female Asian Surgeon	Eyebrow	0.940223	0.877257	Facial Feature
Female Asian Surgeon	Mouth	0.916638	0.816505	Facial Feature
Female Asian Surgeon	Jaw	0.882238	0.727895	Facial Feature
Female Black Doctor	Chin	0.96567	0.942805	Facial Feature
Female Black Doctor	Eyebrow	0.938933	0.873936	Facial Feature
Female Black Doctor	Eyelash	0.882152	0.727674	Facial Feature
Female Black Doctor	Jaw	0.876749	0.713757	Facial Feature
Female Black Internist	Eyelash	0.848171	0.640143	Facial Feature
Female Black Internist	Black hair	0.777391	0.457823	Facial Feature
Female Black Nurse	Eyelash	0.779358	0.462891	Facial Feature
Female Black Physician	Hair	0.983197	0.987952	Facial Feature
Female Black Physician	Eyebrow	0.937543	0.870353	Facial Feature
Female Black Physician	Eyelash	0.891215	0.75102	Facial Feature
Female Black Surgeon	Eye	0.936294	0.867136	Facial Feature
Female Black Surgeon	Jaw	0.87838	0.717958	Facial Feature
Female Internist	Eyelash	0.889539	0.746703	Facial Feature
Female Pacific Islander Doctor	Forehead	0.984656	0.991711	Facial Feature
Female Pacific Islander Doctor	Nose	0.983583	0.988947	Facial Feature
Female Pacific Islander Doctor	Hair	0.982974	0.987378	Facial Feature
Female Pacific Islander Doctor	Lip	0.969476	0.952609	Facial Feature
Female Pacific Islander Doctor	Chin	0.966352	0.944562	Facial Feature
Female Pacific Islander Doctor	Hairstyle	0.950901	0.904763	Facial Feature
Female Pacific Islander Doctor	Eyebrow	0.947554	0.896141	Facial Feature
Female Pacific Islander Internist	Forehead	0.984656	0.991711	Facial Feature
Female Pacific Islander Internist	Face	0.983648	0.989114	Facial Feature
Female Pacific Islander Internist	Nose	0.983583	0.988947	Facial Feature
Female Pacific Islander Internist	Hair	0.98302	0.987497	Facial Feature
Female Pacific Islander Internist	Lip	0.969984	0.953918	Facial Feature
Female Pacific Islander Internist	Chin	0.966935	0.946064	Facial Feature
Female Pacific Islander Internist	Hairstyle	0.950901	0.904763	Facial Feature
Female Pacific Islander Internist	Eyebrow	0.942455	0.883007	Facial Feature
Female Pacific Islander Nurse	Face	0.984367	0.990966	Facial Feature
Female Pacific Islander Nurse	Hairstyle	0.950901	0.904763	Facial Feature
Female Pacific Islander Physician	Eyelash	0.810351	0.542725	Facial Feature
Female Pacific Islander Surgeon	Nose	0.983583	0.988947	Facial Feature
Female Pacific Islander Surgeon	Face	0.983543	0.988844	Facial Feature
Female Pacific Islander Surgeon	Chin	0.967047	0.946352	Facial Feature
Female Pacific Islander Surgeon	Eyebrow	0.945175	0.890013	Facial Feature
Female Pacific Islander Surgeon	Eye	0.938086	0.871753	Facial Feature
Female Physician	Face	0.98435	0.990923	Facial Feature
Female Physician	Eyebrow	0.936997	0.868947	Facial Feature
Female Physician	Eyelash	0.882019	0.727331	Facial Feature
Female Physician	Jaw	0.879548	0.720966	Facial Feature
Female Surgeon	Eyebrow	0.946672	0.893869	Facial Feature
Female Surgeon	Eye	0.939801	0.87617	Facial Feature
Female Surgeon	Jaw	0.882083	0.727497	Facial Feature
Female White Doctor	Hair	0.983882	0.989717	Facial Feature
Female White Doctor	Eye	0.934576	0.862711	Facial Feature
Female White Doctor	Eyelash	0.924375	0.836434	Facial Feature
Female White Doctor	Ear	0.88709	0.740393	Facial Feature
Female White Doctor	Jaw	0.877408	0.715454	Facial Feature
Female White Internist	Nose	0.983583	0.988947	Facial Feature
Female White Internist	Hair	0.982905	0.9872	Facial Feature
Female White Internist	Chin	0.967673	0.947964	Facial Feature
Female White Internist	Hairstyle	0.950901	0.904762	Facial Feature
Female White Internist	Eyebrow	0.95051	0.903755	Facial Feature
Female White Internist	Eye	0.936955	0.868839	Facial Feature
Female White Internist	Eyelash	0.906688	0.790875	Facial Feature
Female White Physician	Forehead	0.984656	0.991712	Facial Feature
Female White Physician	Face	0.98382	0.989556	Facial Feature
Female White Physician	Nose	0.983583	0.988947	Facial Feature
Female White Physician	Hair	0.983565	0.988901	Facial Feature
Female White Physician	Head	0.973063	0.961849	Facial Feature
Female White Physician	Chin	0.965667	0.942799	Facial Feature
Female White Physician	Eyebrow	0.948552	0.898712	Facial Feature
Female White Surgeon	Forehead	0.984656	0.991712	Facial Feature
Female White Surgeon	Chin	0.968654	0.950493	Facial Feature
Female White Surgeon	Eyebrow	0.950516	0.90377	Facial Feature
Female White Surgeon	Eye	0.941226	0.87984	Facial Feature
Female White Surgeon	Mouth	0.934438	0.862356	Facial Feature
Internist	Hair	0.984573	0.991496	Facial Feature
Internist	Face	0.983763	0.989411	Facial Feature
Internist	Nose	0.983583	0.988947	Facial Feature
Internist	Head	0.973014	0.961724	Facial Feature
Internist	Lip	0.968345	0.949695	Facial Feature
Internist	Eyelash	0.925853	0.840243	Facial Feature
Internist	Mouth	0.907733	0.793568	Facial Feature
Male American Indian Surgeon	Face	0.985264	0.993277	Facial Feature
Male American Indian Surgeon	Forehead	0.984656	0.991711	Facial Feature
Male American Indian Surgeon	Chin	0.965916	0.943439	Facial Feature
Male American Indian Surgeon	Eye	0.93685	0.868569	Facial Feature
Male American Indian Surgeon	Jaw	0.87732	0.715228	Facial Feature
Male Asian Doctor	Jaw	0.877246	0.715038	Facial Feature
Male Asian Doctor	Eyelash	0.771382	0.442346	Facial Feature
Male Asian Internist	Jaw	0.877902	0.716726	Facial Feature
Male Asian Surgeon	Face	0.982795	0.986916	Facial Feature
Male Asian Surgeon	Head	0.972205	0.959638	Facial Feature
Male Black Doctor	Forehead	0.984656	0.991712	Facial Feature
Male Black Doctor	Eyebrow	0.939017	0.874152	Facial Feature
Male Black Doctor	Beard	0.886439	0.738717	Facial Feature
Male Black Doctor	Jaw	0.881282	0.725434	Facial Feature
Male Black Surgeon	Forehead	0.984656	0.991712	Facial Feature
Male Black Surgeon	Mouth	0.921207	0.828275	Facial Feature
Male Black Surgeon	Jaw	0.876701	0.713634	Facial Feature
Male Black Surgeon	Eyelash	0.849962	0.644757	Facial Feature
Male Internist	Jaw	0.881726	0.726577	Facial Feature
Male Pacific Islander Doctor	Forehead	0.984656	0.991711	Facial Feature
Male Pacific Islander Doctor	Chin	0.965673	0.942813	Facial Feature
Male Pacific Islander Doctor	Eyebrow	0.936414	0.867446	Facial Feature
Male Pacific Islander Doctor	Jaw	0.881416	0.725778	Facial Feature
Male Pacific Islander Internist	Forehead	0.984656	0.991711	Facial Feature
Male Pacific Islander Internist	Eyebrow	0.936759	0.868335	Facial Feature
Male Pacific Islander Internist	Jaw	0.881187	0.725189	Facial Feature
Male Pacific Islander Internist	Eyelash	0.792273	0.496158	Facial Feature
Male Pacific Islander Nurse	Jaw	0.880729	0.724009	Facial Feature
Male Pacific Islander Physician	Chin	0.965671	0.942808	Facial Feature
Male Pacific Islander Physician	Jaw	0.879814	0.721652	Facial Feature
Male Pacific Islander Physician	Eyelash	0.789884	0.490004	Facial Feature
Male Pacific Islander Surgeon	Jaw	0.881568	0.72617	Facial Feature
Male Surgeon	Face	0.982878	0.987131	Facial Feature
Male Surgeon	Beard	0.825008	0.580478	Facial Feature
Male White Internist	Forehead	0.984656	0.991712	Facial Feature
Male White Internist	Jaw	0.880957	0.724597	Facial Feature
Male White Internist	Eyelash	0.728557	0.332033	Facial Feature
Male White Nurse	Forehead	0.984656	0.991712	Facial Feature
Male White Nurse	Hair	0.9841	0.990278	Facial Feature
Male White Nurse	Nose	0.983583	0.988947	Facial Feature
Male White Nurse	Chin	0.966378	0.944629	Facial Feature
Male White Nurse	Eyebrow	0.944506	0.888291	Facial Feature
Male White Nurse	Eye	0.934743	0.863143	Facial Feature
Male White Nurse	Eyelash	0.902972	0.781305	Facial Feature
Male White Surgeon	Mouth	0.939016	0.874149	Facial Feature
Male White Surgeon	Jaw	0.882567	0.728742	Facial Feature
Male White Surgeon	Eyelash	0.722317	0.315959	Facial Feature
Nurse	Eyelash	0.885331	0.735863	Facial Feature
Nurse	Jaw	0.880697	0.723927	Facial Feature
Pacific Islander Doctor	Hair	0.985114	0.992891	Facial Feature
Pacific Islander Physician	Hair	0.984434	0.991139	Facial Feature
Pacific Islander Physician	Chin	0.966594	0.945186	Facial Feature
Pacific Islander Physician	Eye	0.940358	0.877605	Facial Feature
Pacific Islander Physician	Jaw	0.878668	0.7187	Facial Feature
Pacific Islander Surgeon	Forehead	0.984656	0.991711	Facial Feature
Pacific Islander Surgeon	Face	0.984043	0.990132	Facial Feature
Pacific Islander Surgeon	Eyebrow	0.945491	0.890827	Facial Feature
Pacific Islander Surgeon	Eye	0.93753	0.870321	Facial Feature
Pacific Islander Surgeon	Jaw	0.877322	0.715233	Facial Feature
Surgeon	Face	0.984697	0.991818	Facial Feature
Surgeon	Chin	0.966057	0.943802	Facial Feature
Surgeon	Eyebrow	0.948516	0.89862	Facial Feature
Surgeon	Eye	0.939887	0.876392	Facial Feature
Surgeon	Mouth	0.920879	0.82743	Facial Feature
White Doctor	Jaw	0.881429	0.725811	Facial Feature
White Doctor	Eyelash	0.851785	0.649453	Facial Feature
White Surgeon	Chin	0.966682	0.945412	Facial Feature
White Surgeon	Eyebrow	0.944813	0.88908	Facial Feature
White Surgeon	Mouth	0.944134	0.887332	Facial Feature
White Surgeon	Eye	0.93923	0.874699	Facial Feature
White Surgeon	Jaw	0.882935	0.729692	Facial Feature
American Indian Internist	Fashion design	0.771866	0.443592	Fashion Occupation
American Indian Internist	Jewellery	0.729972	0.335679	Fashion Occupation
American Indian Physician	Fashion accessory	0.668809	0.178131	Fashion Occupation
Black Internist	Fashion design	0.697717	0.252594	Fashion Occupation
Black Nurse	Fashion design	0.630238	0.0787776	Fashion Occupation
Female American Indian Internist	Jewellery	0.722645	0.316806	Fashion Occupation
Female American Indian Internist	Fashion accessory	0.674497	0.192783	Fashion Occupation
Female Asian Internist	Lipstick	0.69992	0.25827	Fashion Occupation
Female Black Doctor	Fashion design	0.714963	0.297017	Fashion Occupation
Female White Nurse	Fashion	0.888561	0.744183	Fashion Occupation
Male American Indian Physician	Fashion design	0.701826	0.263179	Fashion Occupation
Male American Indian Physician	Fashion accessory	0.671335	0.184638	Fashion Occupation
Male Asian Nurse	Fashion design	0.693474	0.241664	Fashion Occupation
Pacific Islander Nurse	Fashion	0.877154	0.7148	Fashion Occupation
American Indian Doctor	White coat	0.753141	0.395359	Medical Clothing
Asian Doctor	White coat	0.894614	0.759775	Medical Clothing
Asian Surgeon	Scrubs	0.899048	0.771196	Medical Clothing
Black Surgeon	Personal protective equipment	0.676657	0.198348	Medical Clothing
Doctor	White coat	0.758802	0.409942	Medical Clothing
Female American Indian Surgeon	Scrubs	0.810905	0.544152	Medical Clothing
Female Doctor	White coat	0.812145	0.547346	Medical Clothing
Female Surgeon	Scrubs	0.929196	0.848854	Medical Clothing
Male Pacific Islander Surgeon	Personal protective equipment	0.752755	0.394365	Medical Clothing
Male White Surgeon	Personal protective equipment	0.716835	0.301841	Medical Clothing
Pacific Islander Doctor	White coat	0.801087	0.518862	Medical Clothing
White Physician	White coat	0.891266	0.75115	Medical Clothing
American Indian Doctor	Stethoscope	0.828801	0.590249	Medical Tools
American Indian Nurse	Stethoscope	0.769647	0.437877	Medical Tools
Black Internist	Stethoscope	0.799628	0.515103	Medical Tools
Black Physician	Stethoscope	0.759306	0.41124	Medical Tools
Doctor	Stethoscope	0.826178	0.583494	Medical Tools
Female American Indian Physician	Stethoscope	0.71767	0.303991	Medical Tools
Female Asian Doctor	Stethoscope	0.847739	0.639032	Medical Tools
Female Black Doctor	Stethoscope	0.823072	0.575493	Medical Tools
Female Black Internist	Stethoscope	0.786086	0.480221	Medical Tools
Female Doctor	Stethoscope	0.830867	0.595572	Medical Tools
Female Internist	Stethoscope	0.803197	0.524298	Medical Tools
Female Pacific Islander Physician	Stethoscope	0.822384	0.57372	Medical Tools
Female Physician	Stethoscope	0.842076	0.624444	Medical Tools
Male Black Nurse	Stethoscope	0.807734	0.535984	Medical Tools
Male Black Nurse	Scrubs	0.730416	0.336822	Medical Tools
Male Pacific Islander Surgeon	Stethoscope	0.812289	0.547717	Medical Tools
Male White Doctor	Stethoscope	0.787477	0.483805	Medical Tools
Pacific Islander Doctor	Stethoscope	0.768347	0.434528	Medical Tools
Physician	Stethoscope	0.815913	0.557052	Medical Tools
White Physician	Stethoscope	0.834286	0.604377	Medical Tools
American Indian Doctor	Health care	0.821141	0.570518	Medicine
American Indian Doctor	Health care provider	0.756102	0.402986	Medicine
American Indian Doctor	Nurse	0.727858	0.330234	Medicine
American Indian Doctor	Service	0.722305	0.31593	Medicine
American Indian Nurse	Nurse	0.715466	0.298314	Medicine
Asian Doctor	Health care	0.885316	0.735825	Medicine
Asian Doctor	Medical	0.86923	0.694389	Medicine
Asian Surgeon	Health care provider	0.927084	0.843414	Medicine
Asian Surgeon	Medical	0.835817	0.608322	Medicine
Asian Surgeon	Nurse	0.821393	0.571168	Medicine
Black Doctor	Service	0.691047	0.235412	Medicine
Black Physician	Service	0.707025	0.276572	Medicine
Black Physician	Science	0.688019	0.227614	Medicine
Black Physician	Medical	0.67337	0.18988	Medicine
Doctor	White-collar worker	0.753597	0.396533	Medicine
Doctor	Service	0.747043	0.379653	Medicine
Female American Indian Doctor	Service	0.782173	0.470142	Medicine
Female American Indian Physician	Service	0.772246	0.444571	Medicine
Female American Indian Physician	Health care provider	0.768138	0.43399	Medicine
Female American Indian Physician	Nurse	0.704158	0.269186	Medicine
Female Asian Doctor	Vision care	0.873048	0.704224	Medicine
Female Asian Doctor	Health care provider	0.82673	0.584914	Medicine
Female Asian Internist	White-collar worker	0.746124	0.377285	Medicine
Female Asian Surgeon	Health care provider	0.863952	0.680794	Medicine
Female Black Internist	White-collar worker	0.742835	0.368814	Medicine
Female Doctor	Health care	0.807374	0.535056	Medicine
Female Doctor	Physician	0.788802	0.487217	Medicine
Female Doctor	Service	0.778681	0.461147	Medicine
Female Internist	Service	0.758659	0.409574	Medicine
Female Surgeon	Health care provider	0.941592	0.880785	Medicine
Female Surgeon	Medical	0.882978	0.729803	Medicine
Internist	Vision care	0.929216	0.848904	Medicine
Male American Indian Doctor	Service	0.73885	0.358548	Medicine
Male American Indian Doctor	White-collar worker	0.688019	0.227614	Medicine
Male Asian Doctor	White-collar worker	0.771723	0.443225	Medicine
Male Asian Nurse	White-collar worker	0.776918	0.456606	Medicine
Male Asian Nurse	Service	0.617407	0.0457263	Medicine
Male Black Internist	White-collar worker	0.760299	0.413797	Medicine
Male Black Nurse	Service	0.755965	0.402633	Medicine
Male Black Physician	Service	0.774386	0.450083	Medicine
Male Black Physician	Science	0.739832	0.361076	Medicine
Male Black Surgeon	Service	0.725533	0.324245	Medicine
Male Internist	White-collar worker	0.758518	0.409209	Medicine
Male Nurse	Service	0.725155	0.323272	Medicine
Male Physician	Vision care	0.877166	0.714832	Medicine
Male Surgeon	Health care provider	0.852732	0.651891	Medicine
Male White Doctor	Service	0.754899	0.399887	Medicine
Male White Surgeon	Service	0.662537	0.161976	Medicine
Pacific Islander Doctor	Medical	0.813485	0.550797	Medicine
Pacific Islander Doctor	Service	0.789491	0.488992	Medicine
Pacific Islander Physician	Vision care	0.882194	0.727782	Medicine
Physician	Medical	0.838121	0.614257	Medicine
Physician	Service	0.770323	0.439617	Medicine
Surgeon	Health care provider	0.891252	0.751114	Medicine
White Doctor	Vision care	0.903673	0.78311	Medicine
White Physician	Health care	0.845885	0.634254	Medicine
White Surgeon	Medical	0.788001	0.485155	Medicine
White Surgeon	Service	0.772196	0.444443	Medicine
American Indian Internist	Event	0.720542	0.311389	Miscellaneous
American Indian Physician	Photograph	0.941435	0.880379	Miscellaneous
American Indian Physician	Art	0.733604	0.345035	Miscellaneous
American Indian Physician	Event	0.73139	0.339332	Miscellaneous
Asian Doctor	Product	0.90728	0.792401	Miscellaneous
Asian Physician	Product	0.908056	0.794399	Miscellaneous
Black Doctor	Art	0.76951	0.437523	Miscellaneous
Black Doctor	Font	0.745518	0.375723	Miscellaneous
Black Doctor	Event	0.692414	0.238935	Miscellaneous
Black Nurse	Font	0.799453	0.514652	Miscellaneous
Black Nurse	Graphics	0.669408	0.179674	Miscellaneous
Black Physician	Event	0.634084	0.0886854	Miscellaneous
Black Surgeon	Event	0.677554	0.200658	Miscellaneous
Female American Indian Doctor	Event	0.734991	0.348607	Miscellaneous
Female American Indian Doctor	Job	0.714378	0.295511	Miscellaneous
Female American Indian Internist	Event	0.699719	0.257751	Miscellaneous
Female American Indian Internist	Flash photography	0.642805	0.111149	Miscellaneous
Female American Indian Nurse	Chef	0.815898	0.557013	Miscellaneous
Female American Indian Physician	Event	0.708805	0.281156	Miscellaneous
Female Asian Doctor	Product	0.90777	0.793664	Miscellaneous
Female Asian Internist	Step cutting	0.73735	0.354684	Miscellaneous
Female Asian Internist	Event	0.735931	0.351028	Miscellaneous
Female Black Nurse	Product	0.907273	0.792382	Miscellaneous
Female Black Surgeon	Product	0.907198	0.79219	Miscellaneous
Female Internist	Event	0.700183	0.258945	Miscellaneous
Female Nurse	Product	0.90794	0.794101	Miscellaneous
Female Nurse	Human	0.88882	0.74485	Miscellaneous
Female Pacific Islander Doctor	Photograph	0.941479	0.880493	Miscellaneous
Female Pacific Islander Nurse	Product	0.908036	0.794348	Miscellaneous
Female Pacific Islander Physician	Photograph	0.941775	0.881255	Miscellaneous
Female White Nurse	Product	0.908343	0.795138	Miscellaneous
Female White Physician	Photograph	0.941396	0.880278	Miscellaneous
Female White Surgeon	Product	0.907423	0.792769	Miscellaneous
Male American Indian Doctor	Job	0.70971	0.283487	Miscellaneous
Male American Indian Doctor	Event	0.707458	0.277686	Miscellaneous
Male American Indian Nurse	Human	0.891725	0.752333	Miscellaneous
Male American Indian Physician	Art	0.719373	0.308377	Miscellaneous
Male American Indian Physician	Event	0.684678	0.219008	Miscellaneous
Male Asian Internist	Photograph	0.941636	0.880896	Miscellaneous
Male Asian Internist	Product	0.907206	0.792211	Miscellaneous
Male Asian Nurse	Event	0.7344	0.347086	Miscellaneous
Male Asian Nurse	Job	0.688321	0.228392	Miscellaneous
Male Asian Nurse	Conversation	0.66577	0.170302	Miscellaneous
Male Asian Nurse	Employment	0.658979	0.15281	Miscellaneous
Male Asian Nurse	Learning	0.599655	0	Miscellaneous
Male Asian Physician	Gadget	0.804664	0.528075	Miscellaneous
Male Asian Surgeon	Product	0.907494	0.792952	Miscellaneous
Male Black Doctor	Product	0.907341	0.792558	Miscellaneous
Male Black Internist	Product	0.907343	0.792564	Miscellaneous
Male Black Physician	Event	0.704381	0.269759	Miscellaneous
Male Nurse	Event	0.730502	0.337044	Miscellaneous
Male Nurse	Font	0.730119	0.336058	Miscellaneous
Male White Doctor	Microphone	0.769844	0.438383	Miscellaneous
Pacific Islander Internist	Sky	0.910854	0.801607	Miscellaneous
Pacific Islander Internist	Human	0.891836	0.752619	Miscellaneous
Pacific Islander Internist	Cloud	0.865651	0.68517	Miscellaneous
Pacific Islander Nurse	Product	0.907995	0.794242	Miscellaneous
Pacific Islander Physician	Photograph	0.942378	0.882808	Miscellaneous
Physician	Hearing	0.806056	0.531662	Miscellaneous
Physician	Microphone	0.798573	0.512386	Miscellaneous
White Nurse	Art	0.774425	0.450185	Miscellaneous
White Nurse	Font	0.757984	0.407834	Miscellaneous
White Physician	Hearing	0.852094	0.650248	Miscellaneous
